# Supplementary material for: Comparative Plastid Genomics of Green-Colored Dinoflagellates Unveils Parallel Genome Compaction and RNA Editing
Source: Front Plant Sci. 2022 Jul 11;13:918543. doi: 10.3389/fpls.2022.918543 (PMC9309888; doi:10.3389/fpls.2022.918543)
Supplement: Supplementary file 4 [file Data_Sheet_4.xlsx]

## Sheet: data_for_test
Lep_50		MGD_50		TGD_50
0.0075087		3.49102e-05		0.00214448
BL_ratio_photo	BL_ratio_nonphoto	BL_ratio_photo	BL_ratio_nonphoto	BL_ratio_photo	BL_ratio_nonphoto
2.59619	2.04378	3.052	2.71757	14.296	3.01
2.98953	1.88363	0.646574	2.93721	1.9865	2.55419
2.57535	10.1128	0.989242	1.97523	2.05103	0.70461
2.74482	3.19609	1.56041	2.32432	0.49407	1.69998
0.571262	2.1071	0.403989	1.12423	0.823541	1.45106
0.494055	9.84674	0.515839	0.734565	0	1.90415
1.22033	1.8028	0.187659	1.55862	0.379742	1.61829
0.824278	1.6697	0.356037	2.06258	0.627396	0.849318
0.427011	1.6697	0.19789	1.19177	0.49407	0.993941
1.77221	5.81733	0.989242	1.19177	3.28481	0.993941
1.6726	1.36206	0.192075	1.51932	0.250337	1.43678
2.06358	1.42208	1.17456	0.653529	1.98137	0.55399
8.39868	0.778985	0.524171	1.62508	0.6423	1.10215
0.915356	1.84025	0.172155	0.862069	0.558681	0.92156
1.05246	2.82179	0.579839	0.363253	0.568493	1.02361
4.42388	2.1071	1.05623	1.1673	1.05623	1.36537
5.69189	1.65211	0.41745	1.08832	0.672976	0.682597
0.395401	2.09394	0.106023	2.10524	0.331056	1.74998
1.0109	24.8684	0.494884	1.05806	0.429817	1.07957
0.753892	4.00167	0.147779	0.299624	0.382118	0.520206
0.788053		0.459176		0.574948
0.520129		0.263902		0.444697
0.901793		0.301596		0.630321
1.78285		0.510661		0.549843
1.70156		0.354143		0.418974
0.622604		0.169917		0.297022
0.971739		0.470021		0.553443
1.58082		0.390174		0.54886
1.95067		0.869538		1.11692
1.97547		0.80983		1.08695

## Sheet: MGD_50trees
Function	Trees	K-score	Scale_factor	length	topology	BL_lep	BL_others	BL_ratio
photosynthesis	psaI	0.10637	0.22283	29	(MGD:1.1120585076,(MarsNIES:0.2507350467,YPF-701:0.1136300067):0.0000010000,(PediMino:0.0000010000,PediTube:0.0000010000):0.0000020919);	1.11206	0.36437	3.052
photosynthesis	petG	0.13238	1.60976	31	(MGD:0.1106775145,(MarsNIES:0.0791042904,YPF-701:0.0000010000):0.0000010000,(PediMino:0.0479460744,PediTube:0.0441219264):0.0000010000);	0.110678	0.171175	0.646574
photosynthesis	psbM	0.20062	2.0255	31	(MGD:0.2463739692,(MarsNIES:0.0703180300,YPF-701:0.0274202195):0.1279722490,(PediMino:0.0000010000,PediTube:0.0233394026):0.0000024211);	0.246374	0.249053	0.989242
photosynthesis	psbI	0.1138	2.25119	32	(MGD:0.1019834334,(MarsNIES:0.0323175161,YPF-701:0.0000010000):0.0000010000,(PediMino:0.0000010000,PediTube:0.0330354575):0.0000010000);	0.101983	0.065357	1.56041
photosynthesis	psbF	0.13548	2.60217	34	(MGD:0.0620562638,(MarsNIES:0.0312858153,YPF-701:0.0000010000):0.0301920901,(PediMino:0.0293322341,PediTube:0.0290221268):0.0337756618);	0.0620563	0.153609	0.403989
photosynthesis	psbL	0.15936	4.35626	34	(MGD:0.0305788309,(MarsNIES:0.0299146424,YPF-701:0.0000010000):0.0293611338,(PediMino:0.0000010000,PediTube:0.0000010000):0.0000010000);	0.0305788	0.0592798	0.515839
translation	rpl23	0.13296	0.05276	34	(MGD:4.2781343153,(MarsNIES:0.0000022063,YPF-701:0.4385677466):1.6186980354,(PediMino:0.1086157810,PediTube:0.0000020349):0.0000021548);	4.27813	2.16589	1.97523
photosynthesis	psaJ	0.22991	0.29682	37	(MGD:0.1572828576,(MarsNIES:0.1418573009,YPF-701:0.0296948576):0.0704397563,(PediMino:0.0000027018,PediTube:0.4391098664):0.1570264034);	0.157283	0.838131	0.187659
translation	rpl36	0.09822	0.22972	37	(MGD:1.0682171650,(MarsNIES:0.3406119867,YPF-701:0.0936783722):0.0000010000,(PediMino:0.0000027084,PediTube:0.0252858943):0.0000026860);	1.06822	0.459583	2.32432
photosynthesis	psbK	0.20681	1.02064	39	(MGD:0.0819167922,(MarsNIES:0.0000010000,YPF-701:0.1477962139):0.0000010000,(PediMino:0.0265468573,PediTube:0.0000010000):0.0557330437);	0.0819168	0.230079	0.356037
photosynthesis	psbJ	0.206	0.733	42	(MGD:0.0792109278,(MarsNIES:0.0874020510,YPF-701:0.2102068195):0.0000010000,(PediMino:0.0504325807,PediTube:0.0522343419):0.0000010000);	0.0792109	0.400278	0.19789
photosynthesis	psbN	0.10254	0.88982	44	(MGD:0.2463739692,(MarsNIES:0.0703180300,YPF-701:0.0274202195):0.1279722490,(PediMino:0.0000010000,PediTube:0.0233394026):0.0000024211);	0.246374	0.249053	0.989242
translation	rps18	0.09121	0.22751	48	(MGD:1.0236003594,(MarsNIES:0.2370933231,YPF-701:0.1704774523):0.4248714357,(PediMino:0.0513251781,PediTube:0.0267187786):0.0000029004);	1.0236	0.910489	1.12423
photosynthesis	psbH	0.17298	0.75968	60	(MGD:0.1032132078,(MarsNIES:0.1558946296,YPF-701:0.1671170425):0.1030840525,(PediMino:0.0777943392,PediTube:0.0000020542):0.0334655052);	0.103213	0.537358	0.192075
photosynthesis	psbZ	0.11432	0.72812	62	(MGD:0.3131021215,(MarsNIES:0.0272995531,YPF-701:0.0372051561):0.1263181501,(PediMino:0.0555814342,PediTube:0.0201641150):0.0000020190);	0.313102	0.26657	1.17456
translation	rps9	0.09437	0.30502	64	(MGD:0.7081095377,(MarsNIES:0.0788599624,YPF-701:0.3918420908):0.1110808868,(PediMino:0.0760392665,PediTube:0.1622649302):0.1438976657);	0.70811	0.963985	0.734565
photosynthesis	atpF	0.09573	0.29847	70	(MGD:0.6176920521,(MarsNIES:0.3834185123,YPF-701:0.3143299239):0.0273196689,(PediMino:0.0000027704,PediTube:0.1153141894):0.3380328938);	0.617692	1.17842	0.524171
translation	rps3	0.08759	0.53108	73	(MGD:0.4679872731,(MarsNIES:0.1233306445,YPF-701:0.0590882254):0.0189564145,(PediMino:0.0719569437,PediTube:0.0000026965):0.0269219159);	0.467987	0.300257	1.55862
photosynthesis	psbE	0.21552	1.6953	76	(MGD:0.0275914768,(MarsNIES:0.0324324367,YPF-701:0.0880245653):0.0000026286,(PediMino:0.0129635737,PediTube:0.0268465135):0.0000010000);	0.0275915	0.160271	0.172155
photosynthesis	atpH	0.16258	1.79658	79	(MGD:0.0722123899,(MarsNIES:0.0978910624,YPF-701:0.0000025659):0.0000010000,(PediMino:0.0000010000,PediTube:0.0000010000):0.0266420934);	0.0722124	0.124539	0.579839
translation	rps19	0.11133	0.11261	80	(MGD:2.1395737002,(MarsNIES:0.5043224600,YPF-701:0.0000025443):0.0000020504,(PediMino:0.0000025857,PediTube:0.0662154833):0.4667833813);	2.13957	1.03733	2.06258
photosynthesis	psaC	0.15011	6.64978	81	(MGD:0.0290267640,(MarsNIES:0.0000010000,YPF-701:0.0137671964):0.0000010000,(PediMino:0.0137101832,PediTube:0.0000010000):0.0000010000);	0.0290268	0.0274814	1.05623
translation	rpl16	0.0806	0.11275	100	(MGD:2.1453007953,(MarsNIES:0.5376822508,YPF-701:0.2339063147):0.7137158950,(PediMino:0.0000026621,PediTube:0.1666857361):0.1481095553);	2.1453	1.8001	1.19177
translation	rpl20	0.0806	0.11275	100	(MGD:2.1453007953,(MarsNIES:0.5376822508,YPF-701:0.2339063147):0.7137158950,(PediMino:0.0000026621,PediTube:0.1666857361):0.1481095553);	2.1453	1.8001	1.19177
translation	rps14	0.0835	0.14849	100	(MGD:1.6977070503,(MarsNIES:0.2831839639,YPF-701:0.3130550260):0.1210698537,(PediMino:0.0411999392,PediTube:0.1044601388):0.2544410544);	1.69771	1.11741	1.51932
translation	rpl14	0.13686	0.3675	113	(MGD:0.4813342198,(MarsNIES:0.0983716517,YPF-701:0.1375983779):0.3962300769,(PediMino:0.0000028301,PediTube:0.1015479751):0.0027640892);	0.481334	0.736515	0.653529
translation	rps11	0.08195	0.28952	113	(MGD:0.8465896975,(MarsNIES:0.3105413773,YPF-701:0.0788635649):0.1129898320,(PediMino:0.0044980016,PediTube:0.0140584583):0.0000024334);	0.84659	0.520954	1.62508
photosynthesis	atpE	0.1132	0.43011	116	(MGD:0.3544009200,(MarsNIES:0.4005056805,YPF-701:0.1517554561):0.1574421970,(PediMino:0.0440189289,PediTube:0.0036410398):0.0916030843);	0.354401	0.848966	0.41745
translation	rps4	0.09327	0.20941	117	(MGD:1.0212270865,(MarsNIES:0.5374865722,YPF-701:0.0327146705):0.4452292928,(PediMino:0.0728664740,PediTube:0.0963244598):0.0000024144);	1.02123	1.18462	0.862069
translation	rps12	0.1763	1.39764	119	(MGD:0.0844970421,(MarsNIES:0.0078638283,YPF-701:0.0696223736):0.0604143408,(PediMino:0.0082459840,PediTube:0.0000010000):0.0864644678);	0.084497	0.232612	0.363253
translation	rps7	0.07576	0.24248	127	(MGD:1.0154145947,(MarsNIES:0.2490738441,YPF-701:0.1068077472):0.2153299218,(PediMino:0.0441751918,PediTube:0.0323905955):0.2221054896);	1.01541	0.869883	1.1673
other	clpP	0.11631	0.32487	144	(MGD:0.7615171019,(MarsNIES:0.0803020876,YPF-701:0.0348934267):0.0308059896,(PediMino:0.0485690864,PediTube:0.0116869666):0.0739624072);	0.761517	0.28022	2.71757
translation	rpl5	0.0734	0.20268	154	(MGD:1.1718748201,(MarsNIES:0.2785632385,YPF-701:0.3989548256):0.3453464707,(PediMino:0.0262103743,PediTube:0.0276924313):0.0000021434);	1.17187	1.07677	1.08832
photosynthesis	petD	0.20386	1.02982	160	(MGD:0.0374593948,(MarsNIES:0.1029126915,YPF-701:0.1298657143):0.0422603128,(PediMino:0.0315815043,PediTube:0.0134210264):0.0332714834);	0.0374594	0.353313	0.106023
other	ycf3	0.11511	0.56124	161	(MGD:0.4422950445,(MarsNIES:0.0321419490,YPF-701:0.0466009994):0.0284753916,(PediMino:0.0000023126,PediTube:0.0124262693):0.0309362852);	0.442295	0.150583	2.93721
translation	rps2	0.10439	0.11236	174	(MGD:2.2243619834,(MarsNIES:0.2610006107,YPF-701:0.2712994842):0.0622638140,(PediMino:0.0787917192,PediTube:0.0878147666):0.2954118337);	2.22436	1.05658	2.10524
photosynthesis	petB	0.10585	2.64497	215	(MGD:0.0653190067,(MarsNIES:0.0553127937,YPF-701:0.0251278423):0.0000010000,(PediMino:0.0014987310,PediTube:0.0327373589):0.0173108276);	0.065319	0.131989	0.494884
photosynthesis	atpI	0.18723	0.65734	219	(MGD:0.0864125529,(MarsNIES:0.2253646641,YPF-701:0.1652453785):0.0408517692,(PediMino:0.0489320277,PediTube:0.0723009302):0.0320483517);	0.0864126	0.584743	0.147779
translation	rpl2	0.05981	0.3179	251	(MGD:0.7670595342,(MarsNIES:0.2744129789,YPF-701:0.1327409022):0.0647965914,(PediMino:0.0108965451,PediTube:0.0641027670):0.1780200665);	0.76706	0.72497	1.05806
photosynthesis	petA	0.08896	0.63073	276	(MGD:0.2785915117,(MarsNIES:0.2613223007,YPF-701:0.1091884738):0.0428567010,(PediMino:0.0518723525,PediTube:0.0717340546):0.0697464492);	0.278592	0.60672	0.459176
photosynthesis	psbA	0.15741	3.10596	341	(MGD:0.0317848123,(MarsNIES:0.0472427037,YPF-701:0.0432807715):0.0093142747,(PediMino:0.0100966159,PediTube:0.0057124413):0.0047948702);	0.0317848	0.120442	0.263902
photosynthesis	psbD	0.14168	4.54067	352	(MGD:0.0287845595,(MarsNIES:0.0231233507,YPF-701:0.0134744285):0.0217492529,(PediMino:0.0146570222,PediTube:0.0224357159):0.0000010000);	0.0287846	0.0954408	0.301596
translation	tufA	0.1304	2.03379	358	(MGD:0.0639034212,(MarsNIES:0.0714705131,YPF-701:0.0304227751):0.0503905901,(PediMino:0.0149907616,PediTube:0.0378393179):0.0081644788);	0.0639034	0.213278	0.299624
photosynthesis	atpA	0.06651	1.40315	437	(MGD:0.1440196344,(MarsNIES:0.0664481908,YPF-701:0.0778495264):0.0372579743,(PediMino:0.0456933466,PediTube:0.0131318647):0.0416452230);	0.14402	0.282026	0.510661
photosynthesis	atpB	0.10061	2.16969	447	(MGD:0.0747371524,(MarsNIES:0.0596355686,YPF-701:0.0288348492):0.0320824481,(PediMino:0.0159614876,PediTube:0.0428416493):0.0316806998);	0.0747372	0.211037	0.354143
photosynthesis	psbC	0.17642	2.44306	461	(MGD:0.0328115575,(MarsNIES:0.0261463041,YPF-701:0.0461020961):0.0335105538,(PediMino:0.0243378780,PediTube:0.0341421147):0.0288641158);	0.0328116	0.193103	0.169917
photosynthesis	rbcL	0.07973	2.43205	475	(MGD:0.0746489645,(MarsNIES:0.0491170810,YPF-701:0.0523704944):0.0282650352,(PediMino:0.0074297989,PediTube:0.0153022678):0.0063358128);	0.074649	0.15882	0.470021
photosynthesis	psbB	0.08735	1.935	508	(MGD:0.0913981995,(MarsNIES:0.0511211464,YPF-701:0.0504360963):0.0420643582,(PediMino:0.0267174769,PediTube:0.0452418130):0.0186691828);	0.0913982	0.23425	0.390174
photosynthesis	psaB	0.04871	1.33798	730	(MGD:0.1780052855,(MarsNIES:0.0645270204,YPF-701:0.0474439969):0.0369293291,(PediMino:0.0141779630,PediTube:0.0416319706):0.0000021551);	0.178005	0.204712	0.869538
photosynthesis	psaA	0.04355	1.89115	751	(MGD:0.1242244727,(MarsNIES:0.0471546714,YPF-701:0.0465296226):0.0130142302,(PediMino:0.0156936881,PediTube:0.0238262272):0.0071773793);	0.124224	0.153396	0.80983

## Sheet: TGD_50trees
Function	Trees	K-score	Scale_factor	length	topology	BL_lep	BL_others	BL_ratio
photosynthesis	psaI	0.13694	0.04748	29	(TGD:5.7826366460,(MarsNIES:0.2850651376,YPF-701:0.1194238171):0.0000010000,(PediMino:0.0000010000,PediTube:0.0000010000):0.0000020919);	5.78264	0.404494	14.296
photosynthesis	petG	0.10648	0.99619	31	(TGD:0.2768085631,(MarsNIES:0.0656496531,YPF-701:0.0000010000):0.0000021029,(PediMino:0.0375863407,PediTube:0.0361045613):0.0000010000);	0.276809	0.139345	1.9865
photosynthesis	psbM	0.16697	1.68655	31	(TGD:0.1374093262,(MarsNIES:0.0000000000,YPF-701:0.0000000000):0.0000010000,(PediMino:0.0000010000,PediTube:0.0669922943):0.0000010000);	0.137409	0.0669953	2.05103
photosynthesis	psbI	0.19904	4.18937	32	(TGD:0.0319853183,(MarsNIES:0.0319853410,YPF-701:0.0000010000):0.0000010000,(PediMino:0.0000010000,PediTube:0.0327491568):0.0000010000);	0.0319853	0.0647385	0.49407
photosynthesis	psbF	0.10094	1.94538	34	(TGD:0.1309325710,(MarsNIES:0.0320027791,YPF-701:0.0000010000):0.0292921491,(PediMino:0.0305031691,PediTube:0.0300279018):0.0371602976);	0.130933	0.158987	0.823541
photosynthesis	psbL	0.28771	2.51993	34	(TGD:0.0000000000,((MarsNIES:0.0303363357,YPF-701:0.0000010000):0.0300368724,PediMino:0.0000010000):0.0000010000,PediTube:0.0000000000);	0	0.0603762	0
translation	rpl23	0.15249	0.17928	34	(TGD:1.1645887111,(MarsNIES:0.0000023793,YPF-701:0.3944807685):0.4568714384,(PediMino:0.0711136252,PediTube:0.0338313054):0.6965147184);	1.16459	1.65281	0.70461
photosynthesis	psaJ	0.21504	0.37934	37	(TGD:0.3117584259,(MarsNIES:0.1732768292,YPF-701:0.0000026978):0.0705632737,(PediMino:0.0000020167,PediTube:0.4219754035):0.1551542494);	0.311758	0.820974	0.379742
translation	rpl36	0.08588	0.35882	37	(TGD:0.7501435539,(MarsNIES:0.3211063757,YPF-701:0.0952479035):0.0000010000,(PediMino:0.0000010000,PediTube:0.0249071166):0.0000020639);	0.750144	0.441265	1.69998
photosynthesis	psbK	0.18514	1.16702	39	(TGD:0.1407686992,(MarsNIES:0.0000010000,YPF-701:0.1435985370):0.0000010000,(PediMino:0.0260435641,PediTube:0.0000010000):0.0547247572);	0.140769	0.22437	0.627396
photosynthesis	psbJ	0.1812	0.80052	42	(TGD:0.0319853183,(MarsNIES:0.0319853410,YPF-701:0.0000010000):0.0000010000,(PediMino:0.0000010000,PediTube:0.0327491568):0.0000010000);	0.0319853	0.0647385	0.49407
photosynthesis	psbN	0.11691	0.32402	44	(TGD:0.8619537515,(MarsNIES:0.0735271728,YPF-701:0.0277552135):0.1368727133,(PediMino:0.0000021049,PediTube:0.0242465978):0.0000024211);	0.861954	0.262406	3.28481
translation	rps18	0.09921	0.19028	48	(TGD:1.4160208640,(MarsNIES:0.2243024668,YPF-701:0.1831655528):0.4921266465,(PediMino:0.0437793547,PediTube:0.0324777685):0.0000023381);	1.41602	0.975854	1.45106
photosynthesis	psbH	0.18276	1.00258	60	(TGD:0.1126179688,(MarsNIES:0.1361899009,YPF-701:0.1347631405):0.0568634652,(PediMino:0.0777834564,PediTube:0.0000020354):0.0442633504);	0.112618	0.449865	0.250337
photosynthesis	psbZ	0.11035	0.55568	62	(TGD:0.5019077369,(MarsNIES:0.0259982139,YPF-701:0.0352681058):0.0899504934,(PediMino:0.0550492125,PediTube:0.0179591196):0.0290879952);	0.501908	0.253313	1.98137
translation	rps9	0.11041	0.13985	64	(TGD:1.9714086071,(MarsNIES:0.0515717212,YPF-701:0.4150112546):0.0000029384,(PediMino:0.0732025812,PediTube:0.1718124961):0.3237192165);	1.97141	1.03532	1.90415
photosynthesis	atpF	0.0618	0.25374	70	(TGD:0.9374576883,(MarsNIES:0.5188296353,YPF-701:0.3657600698):0.1767860657,(PediMino:0.0000027979,PediTube:0.1159373502):0.2822164792);	0.937458	1.45953	0.6423
translation	rps3	0.08107	0.57973	73	(TGD:0.4860728321,(MarsNIES:0.1230966710,YPF-701:0.0588996550):0.0199049487,(PediMino:0.0721130335,PediTube:0.0000023108):0.0263455598);	0.486073	0.300362	1.61829
photosynthesis	psbE	0.15483	1.90395	76	(TGD:0.0936727384,(MarsNIES:0.0343176873,YPF-701:0.0924017370):0.0000026286,(PediMino:0.0139109844,PediTube:0.0270336215):0.0000010000);	0.0936727	0.167668	0.558681
photosynthesis	atpH	0.18758	2.00359	79	(TGD:0.0695974038,(MarsNIES:0.0958565311,YPF-701:0.0000010000):0.0000010000,(PediMino:0.0000010000,PediTube:0.0000010000):0.0265639178);	0.0695974	0.122424	0.568493
translation	rps19	0.05379	0.61332	80	(TGD:0.4234735846,(MarsNIES:0.1897930335,YPF-701:0.0781610509):0.1367462352,(PediMino:0.0265716735,PediTube:0.0321513938):0.0351809044);	0.423474	0.498604	0.849318
photosynthesis	psaC	0.1594	7.51712	81	(TGD:0.0290267640,(MarsNIES:0.0000010000,YPF-701:0.0137671964):0.0000010000,(PediMino:0.0137101832,PediTube:0.0000010000):0.0000010000);	0.0290268	0.0274814	1.05623
translation	rpl16	0.05523	0.17248	100	(TGD:1.5789694558,(MarsNIES:0.4964945166,YPF-701:0.2070023248):0.3958793323,(PediMino:0.0109925713,PediTube:0.1516183679):0.3266080333);	1.57897	1.5886	0.993941
translation	rpl20	0.05523	0.17248	100	(TGD:1.5789694558,(MarsNIES:0.4964945166,YPF-701:0.2070023248):0.3958793323,(PediMino:0.0109925713,PediTube:0.1516183679):0.3266080333);	1.57897	1.5886	0.993941
translation	rps14	0.07303	0.18388	100	(TGD:1.5351437573,(MarsNIES:0.2586722237,YPF-701:0.2879739073):0.3309164294,(PediMino:0.0237185775,PediTube:0.1175124785):0.0496688121);	1.53514	1.06846	1.43678
translation	rpl14	0.16779	0.40839	113	(TGD:0.4288509398,(MarsNIES:0.1140800697,YPF-701:0.1413845216):0.4101194252,(PediMino:0.0000026708,PediTube:0.1085233647):0.0000024709);	0.428851	0.774113	0.55399
translation	rps11	0.07732	0.47552	113	(TGD:0.5397081066,(MarsNIES:0.2841310384,YPF-701:0.0718148545):0.1153688095,(PediMino:0.0000010000,PediTube:0.0183677471):0.0000024282);	0.539708	0.489686	1.10215
photosynthesis	atpE	0.07878	0.40382	116	(TGD:0.5709701859,(MarsNIES:0.3928976339,YPF-701:0.1672156699):0.1417018181,(PediMino:0.0471240978,PediTube:0.0000010000):0.0994859241);	0.57097	0.848426	0.672976
translation	rps4	0.08987	0.22286	117	(TGD:1.1166094857,(MarsNIES:0.5677878525,YPF-701:0.0304114807):0.3866332369,(PediMino:0.0806264108,PediTube:0.0855834304):0.0606091000);	1.11661	1.21165	0.92156
translation	rps12	0.11248	0.95232	119	(TGD:0.2655367486,(MarsNIES:0.0095837977,YPF-701:0.0774287591):0.0832834360,(PediMino:0.0086257321,PediTube:0.0000010000):0.0804894663);	0.265537	0.259412	1.02361
translation	rps7	0.08631	0.2206	127	(TGD:1.2522086843,(MarsNIES:0.2691560919,YPF-701:0.0977157869):0.1361847658,(PediMino:0.0464683330,PediTube:0.0297079034):0.3378866018);	1.25221	0.917119	1.36537
other	clpP	0.11612	0.32965	144	(TGD:0.8502475455,(MarsNIES:0.0804132043,YPF-701:0.0364749187):0.0000022440,(PediMino:0.0475898940,PediTube:0.0131622804):0.1048313161);	0.850248	0.282474	3.01
translation	rpl5	0.09018	0.43893	154	(TGD:0.5230421170,(MarsNIES:0.2260477082,YPF-701:0.2677456947):0.2235108344,(PediMino:0.0254974735,PediTube:0.0234489154):0.0000029004);	0.523042	0.766254	0.682597
photosynthesis	petD	0.15528	1.20435	160	(TGD:0.1208706532,(MarsNIES:0.1107029339,YPF-701:0.1307621400):0.0338286863,(PediMino:0.0344042748,PediTube:0.0104034475):0.0450048516);	0.120871	0.365106	0.331056
other	ycf3	0.10904	0.72688	161	(TGD:0.3861829498,(MarsNIES:0.0320980295,YPF-701:0.0466585851):0.0000022480,(PediMino:0.0000025261,PediTube:0.0127325117):0.0597019659);	0.386183	0.151196	2.55419
translation	rps2	0.08026	0.17296	174	(TGD:1.6619057710,(MarsNIES:0.2415516391,YPF-701:0.2427523986):0.1505607460,(PediMino:0.0758002560,PediTube:0.0850687458):0.1539371210);	1.66191	0.949671	1.74998
photosynthesis	petB	0.13674	3.09023	215	(TGD:0.0559723735,(MarsNIES:0.0567717190,YPF-701:0.0248629525):0.0023733286,(PediMino:0.0064095372,PediTube:0.0272903765):0.0125157390);	0.0559724	0.130224	0.429817
photosynthesis	atpI	0.1362	0.78217	219	(TGD:0.2117033660,(MarsNIES:0.1953312572,YPF-701:0.1741220597):0.0464064663,(PediMino:0.0374721500,PediTube:0.0818313772):0.0188635466);	0.211703	0.554027	0.382118
translation	rpl2	0.0372	0.37276	251	(TGD:0.7450900034,(MarsNIES:0.2577922736,YPF-701:0.1379418457):0.1085744067,(PediMino:0.0125671796,PediTube:0.0596016850):0.1136935191);	0.74509	0.690171	1.07957
photosynthesis	petA	0.0784	0.6489	276	(TGD:0.3458761253,(MarsNIES:0.2476960476,YPF-701:0.1198836446):0.0427825728,(PediMino:0.0555290280,PediTube:0.0671977024):0.0684892315);	0.345876	0.601578	0.574948
photosynthesis	psbA	0.1397	3.18363	341	(TGD:0.0530417197,(MarsNIES:0.0481580620,YPF-701:0.0447503516):0.0104427860,(PediMino:0.0104476310,PediTube:0.0054752729):0.0000021101);	0.0530417	0.119276	0.444697
photosynthesis	psbD	0.08956	4.24685	352	(TGD:0.0560946991,(MarsNIES:0.0203895573,YPF-701:0.0148231724):0.0150734906,(PediMino:0.0106983276,PediTube:0.0256356336):0.0023737171);	0.0560947	0.0889939	0.630321
translation	tufA	0.09356	1.94414	358	(TGD:0.1109171835,(MarsNIES:0.0739713779,YPF-701:0.0273968204):0.0456076604,(PediMino:0.0119449721,PediTube:0.0417232607):0.0125737361);	0.110917	0.213218	0.520206
photosynthesis	atpA	0.07762	1.62571	437	(TGD:0.1420750834,(MarsNIES:0.0641186527,YPF-701:0.0646007836):0.0289048318,(PediMino:0.0443444857,PediTube:0.0115322030):0.0448909208);	0.142075	0.258392	0.549843
photosynthesis	atpB	0.11057	2.27618	447	(TGD:0.0859565568,(MarsNIES:0.0608926193,YPF-701:0.0273479912):0.0387670497,(PediMino:0.0141725940,PediTube:0.0433118755):0.0206673505);	0.0859566	0.205159	0.418974
photosynthesis	psbC	0.15227	2.81639	461	(TGD:0.0550497987,(MarsNIES:0.0276541414,YPF-701:0.0437004534):0.0293579007,(PediMino:0.0254583406,PediTube:0.0313854836):0.0277825378);	0.0550498	0.185339	0.297022
photosynthesis	rbcL	0.08222	2.58362	475	(TGD:0.0852951791,(MarsNIES:0.0466254846,YPF-701:0.0520591135):0.0246809002,(PediMino:0.0070127496,PediTube:0.0152250072):0.0085141410);	0.0852952	0.154117	0.553443
photosynthesis	psbB	0.08549	1.75053	508	(TGD:0.1308378354,(MarsNIES:0.0513931175,YPF-701:0.0514439846):0.0546532724,(PediMino:0.0240411370,PediTube:0.0486389596):0.0082105401);	0.130838	0.238381	0.54886
photosynthesis	psaB	0.04783	1.22245	730	(TGD:0.2292852763,(MarsNIES:0.0633956317,YPF-701:0.0479310536):0.0194318778,(PediMino:0.0131747821,PediTube:0.0426201044):0.0187301848);	0.229285	0.205284	1.11692
photosynthesis	psaA	0.04917	1.58918	751	(TGD:0.1743022905,(MarsNIES:0.0496259070,YPF-701:0.0500961678):0.0099352817,(PediMino:0.0177509225,PediTube:0.0232491451):0.0097017091);	0.174302	0.160359	1.08695

## Sheet: Lep_50trees
Function	Trees	K-score	Scale_factor	length	topology	BL_lep	BL_others	BL_ratio
photosynthesis	psaI	0.08114	0.63705	29	(Lepi_new:0.7964872406,(MarsNIES:0.2010543229,YPF-701:0.1057309372):0.0000020919,(PediMino:0.0000010000,PediTube:0.0000010000):0.0000010000);	0.796487	0.30679	2.59619
photosynthesis	petG	0.1054	1.50408	31	(Lepi_new:0.3414892386,(MarsNIES:0.0460884163,YPF-701:0.0000010000):0.0000010000,(PediMino:0.0346365480,PediTube:0.0335003085):0.0000010000);	0.341489	0.114228	2.98953
photosynthesis	psbM	0.20832	2.59779	31	(Lepi_new:0.1763755822,(MarsNIES:0.0000000000,YPF-701:0.0000000000):0.0000010000,(PediMino:0.0000010000,PediTube:0.0684830314):0.0000010000);	0.176376	0.068486	2.57535
photosynthesis	psbI	0.11516	2.78428	32	(Lepi_new:0.1812984610,(MarsNIES:0.0327005061,YPF-701:0.0000010000):0.0000010000,(PediMino:0.0000010000,PediTube:0.0333465056):0.0000010000);	0.181298	0.066051	2.74482
translation	rpl23	0.17885	0.11674	34	(Lepi_new:4.0351387770,(MarsNIES:0.0293215272,YPF-701:0.3848187491):0.0000028815,(PediMino:0.1039618525,PediTube:0.0000021442):1.4562426774);	4.03514	1.97435	2.04378
photosynthesis	psbF	0.30226	3.5859	34	(Lepi_new:0.0895445033,(MarsNIES:0.0316575145,YPF-701:0.0000010000):0.0650971910,(PediMino:0.0299852524,PediTube:0.0300066776):0.0000010000);	0.0895445	0.156749	0.571262
photosynthesis	psbL	0.37549	7.17968	34	(Lepi_new:0.0302714409,(MarsNIES:0.0307381484,YPF-701:0.0000010000):0.0305292579,(PediMino:0.0000010000,PediTube:0.0000010000):0.0000010000);	0.0302714	0.0612714	0.494055
translation	rpl36	0.11669	0.55005	37	(Lepi_new:0.8776958266,(MarsNIES:0.3406700593,YPF-701:0.0989248387):0.0000010000,(PediMino:0.0000026046,PediTube:0.0263597362):0.0000026837);	0.877696	0.465961	1.88363
photosynthesis	psaJ	0.19504	0.46816	37	(Lepi_new:0.9487185288,(MarsNIES:0.1685267941,YPF-701:0.0000010000):0.0000027538,(PediMino:0.0000010000,PediTube:0.3845478131):0.2243496886);	0.948719	0.777429	1.22033
photosynthesis	psbK	0.29046	1.86979	39	(Lepi_new:0.1830819320,(MarsNIES:0.0000010000,YPF-701:0.1423872835):0.0000010000,(PediMino:0.0255235409,PediTube:0.0000010000):0.0541981553);	0.183082	0.222112	0.824278
photosynthesis	psbJ	0.35828	1.32761	42	(Lepi_new:0.1752925296,(MarsNIES:0.0935626306,YPF-701:0.2085706727):0.0000010000,(PediMino:0.0551195992,PediTube:0.0532561450):0.0000010000);	0.175293	0.410511	0.427011
photosynthesis	psbN	0.11933	1.11797	44	(Lepi_new:0.4407390507,(MarsNIES:0.0733523277,YPF-701:0.0259176676):0.1254668350,(PediMino:0.0000010000,PediTube:0.0239544014):0.0000024211);	0.440739	0.248695	1.77221
translation	rps18	0.12662	0.05178	48	(Lepi_new:9.9999981951,(MarsNIES:0.2029177457,YPF-701:0.2168447772):0.4751778347,(PediMino:0.0840820661,PediTube:0.0098206529):0.0000025906);	10	0.988846	10.1128
photosynthesis	psbH	0.05205	0.84453	60	(Lepi_new:0.6031224481,(MarsNIES:0.1127725688,YPF-701:0.1085859742):0.0712544653,(PediMino:0.0414901201,PediTube:0.0264832046):0.0000023936);	0.603122	0.360589	1.6726
photosynthesis	psbZ	0.09363	0.88213	62	(Lepi_new:0.5827493753,(MarsNIES:0.0293635577,YPF-701:0.0391924171):0.0611660050,(PediMino:0.0606129326,PediTube:0.0203939246):0.0716683165);	0.582749	0.282397	2.06358
translation	rps9	0.11574	0.09158	64	(Lepi_new:5.5815454670,(MarsNIES:0.0000025997,YPF-701:0.9161944656):0.0000023517,(PediMino:0.0000024487,PediTube:0.2687271321):0.5614377451);	5.58155	1.74637	3.19609
photosynthesis	atpF	0.11682	0.05315	70	(Lepi_new:9.7823236284,(MarsNIES:0.4170956692,YPF-701:0.2910712817):0.2900876245,(PediMino:0.0000027704,PediTube:0.1132193339):0.0532685715);	9.78232	1.16475	8.39868
translation	rps3	0.07876	1.03313	73	(Lepi_new:2.0820958375,(MarsNIES:0.2608026087,YPF-701:0.2438151654):0.2777856447,(PediMino:0.0779531205,PediTube:0.0874085547):0.0403683327);	2.0821	0.988133	2.1071
photosynthesis	psbE	0.21515	2.57349	76	(Lepi_new:0.1576151486,(MarsNIES:0.0353295248,YPF-701:0.0946393759):0.0000026286,(PediMino:0.0139781985,PediTube:0.0282393137):0.0000010000);	0.157615	0.17219	0.915356
photosynthesis	atpH	0.2475	2.99164	79	(Lepi_new:0.1250913746,(MarsNIES:0.0932394171,YPF-701:0.0000028517):0.0000010000,(PediMino:0.0000010000,PediTube:0.0000010000):0.0256111833);	0.125091	0.118856	1.05246
translation	rps19	0.12334	0.08807	80	(Lepi_new:5.8869788904,(MarsNIES:0.2458172061,YPF-701:0.0467690483):0.0000022120,(PediMino:0.0000020052,PediTube:0.0595229700):0.2457475398);	5.88698	0.597861	9.84674
photosynthesis	psaC	0.12937	4.31492	81	(Lepi_new:0.1185264098,(MarsNIES:0.0000010000,YPF-701:0.0133923995):0.0000010000,(PediMino:0.0133959892,PediTube:0.0000010000):0.0000010000);	0.118526	0.0267924	4.42388
translation	rps14	0.02977	0.27943	100	(Lepi_new:1.8491590653,(MarsNIES:0.2935189318,YPF-701:0.2512230005):0.1364308249,(PediMino:0.0582712252,PediTube:0.0843748096):0.2018977518);	1.84916	1.02572	1.8028
translation	rpl16	0.06072	0.26307	100	(Lepi_new:1.9388606322,(MarsNIES:0.3388178255,YPF-701:0.1899795640):0.1242601123,(PediMino:0.0562444174,PediTube:0.0959949847):0.3559051600);	1.93886	1.1612	1.6697
translation	rpl20	0.06072	0.26307	100	(Lepi_new:1.9388606322,(MarsNIES:0.3388178255,YPF-701:0.1899795640):0.1242601123,(PediMino:0.0562444174,PediTube:0.0959949847):0.3559051600);	1.93886	1.1612	1.6697
translation	rps11	0.10051	0.17536	113	(Lepi_new:2.9713795562,(MarsNIES:0.2998367034,YPF-701:0.0790149981):0.1134064101,(PediMino:0.0013364930,PediTube:0.0171836547):0.0000026758);	2.97138	0.510781	5.81733
translation	rpl14	0.16606	0.49183	113	(Lepi_new:0.9445306952,(MarsNIES:0.0707097323,YPF-701:0.1515837657):0.3703495511,(PediMino:0.0209521667,PediTube:0.0798577332):0.0000027239);	0.944531	0.693456	1.36206
photosynthesis	atpE	0.10254	0.09889	116	(Lepi_new:5.2703861191,(MarsNIES:0.4263189101,YPF-701:0.1745359571):0.2761941312,(PediMino:0.0488922788,PediTube:0.0000024369):0.0000024643);	5.27039	0.925946	5.69189
translation	rps4	0.09162	0.33968	117	(Lepi_new:1.4502174840,(MarsNIES:0.4432629142,YPF-701:0.0538749742):0.0916158142,(PediMino:0.0606441489,PediTube:0.1016097453):0.2687801865);	1.45022	1.01979	1.42208
translation	rps12	0.29759	1.88434	119	(Lepi_new:0.1777945255,(MarsNIES:0.0190623858,YPF-701:0.0613788367):0.1396850325,(PediMino:0.0081090119,PediTube:0.0000010000):0.0000023873);	0.177795	0.228239	0.778985
translation	rps7	0.0611	0.3367	127	(Lepi_new:1.5245461789,(MarsNIES:0.2440455268,YPF-701:0.1075632344):0.2350582417,(PediMino:0.0448759079,PediTube:0.0322001538):0.1647018417);	1.52455	0.828445	1.84025
other	clpP	0.1378	0.07394	144	(Lepi_new:6.9740290309,(MarsNIES:0.0790427067,YPF-701:0.0377404980):0.0619353016,(PediMino:0.0449004104,PediTube:0.0163186355):0.0404996927);	6.97403	0.280437	24.8684
translation	rpl5	0.07727	0.17034	154	(Lepi_new:3.0431935551,(MarsNIES:0.3296811701,YPF-701:0.3698853300):0.0000022286,(PediMino:0.0480503360,PediTube:0.0037656212):0.3270789886);	3.04319	1.07846	2.82179
photosynthesis	petD	0.32664	1.99047	160	(Lepi_new:0.1289438472,(MarsNIES:0.1096640805,YPF-701:0.1166257920):0.0363697980,(PediMino:0.0284792912,PediTube:0.0169229325):0.0180475272);	0.128944	0.326109	0.395401
other	ycf3	0.09214	0.85829	161	(Lepi_new:0.6083564435,(MarsNIES:0.0325637985,YPF-701:0.0474647217):0.0302389160,(PediMino:0.0000021179,PediTube:0.0128191179):0.0289370715);	0.608356	0.152026	4.00167
translation	rps2	0.05796	0.24865	174	(Lepi_new:2.0820958375,(MarsNIES:0.2608026087,YPF-701:0.2438151654):0.2777856447,(PediMino:0.0779531205,PediTube:0.0874085547):0.0403683327);	2.0821	0.988133	2.1071
photosynthesis	petB	0.13448	3.47553	215	(Lepi_new:0.1316019359,(MarsNIES:0.0564046831,YPF-701:0.0221790186):0.0000010000,(PediMino:0.0069923386,PediTube:0.0277377414):0.0168676823);	0.131602	0.130182	1.0109
photosynthesis	atpI	0.18069	1.00015	219	(Lepi_new:0.4144799066,(MarsNIES:0.2243602147,YPF-701:0.1425467417):0.0144127397,(PediMino:0.0648464461,PediTube:0.0551891860):0.0484315923);	0.41448	0.549787	0.753892
translation	rpl2	0.05787	0.46164	251	(Lepi_new:1.0982891307,(MarsNIES:0.2414575015,YPF-701:0.1391953653):0.0304802763,(PediMino:0.0097688758,PediTube:0.0634998736):0.1803758303);	1.09829	0.664778	1.65211
photosynthesis	petA	0.17017	0.8207	276	(Lepi_new:0.5165382305,(MarsNIES:0.2886107094,YPF-701:0.1075438508):0.0367672761,(PediMino:0.0622262190,PediTube:0.0667165948):0.0935964245);	0.516538	0.655461	0.788053
photosynthesis	psbA	0.29206	4.82572	341	(Lepi_new:0.0627315654,(MarsNIES:0.0486864932,YPF-701:0.0449209954):0.0103774735,(PediMino:0.0106595797,PediTube:0.0054230021):0.0005402392);	0.0627316	0.120608	0.520129
photosynthesis	psbD	0.14533	5.56372	352	(Lepi_new:0.0821162684,(MarsNIES:0.0210156978,YPF-701:0.0148264924):0.0164706913,(PediMino:0.0092385115,PediTube:0.0275480519):0.0019594346);	0.0821163	0.0910589	0.901793
translation	tufA	0.06778	1.27786	358	(Lepi_new:0.4034466275,(MarsNIES:0.0635211979,YPF-701:0.0276336058):0.0000024289,(PediMino:0.0133506149,PediTube:0.0379260508):0.0502392975);	0.403447	0.192673	2.09394
photosynthesis	atpA	0.07062	1.11368	437	(Lepi_new:0.4586312269,(MarsNIES:0.0584951646,YPF-701:0.0714087584):0.0703316270,(PediMino:0.0410103740,PediTube:0.0159983736):0.0000021062);	0.458631	0.257246	1.78285
photosynthesis	atpB	0.06485	1.38608	447	(Lepi_new:0.3683284330,(MarsNIES:0.0650676694,YPF-701:0.0267841598):0.0564053200,(PediMino:0.0143982359,PediTube:0.0454997078):0.0083103294);	0.368328	0.216465	1.70156
photosynthesis	psbC	0.18379	3.75546	461	(Lepi_new:0.1110216963,(MarsNIES:0.0279821776,YPF-701:0.0411734452):0.0231379313,(PediMino:0.0268085488,PediTube:0.0296016487):0.0296144313);	0.111022	0.178318	0.622604
photosynthesis	rbcL	0.13294	2.87627	475	(Lepi_new:0.1587324289,(MarsNIES:0.0497406012,YPF-701:0.0559601488):0.0350241930,(PediMino:0.0076378185,PediTube:0.0149838946):0.0000022459);	0.158732	0.163349	0.971739
photosynthesis	psbB	0.06575	1.44294	508	(Lepi_new:0.3530076310,(MarsNIES:0.0487145971,YPF-701:0.0489411353):0.0519540969,(PediMino:0.0248759269,PediTube:0.0456769598):0.0031444644);	0.353008	0.223307	1.58082
photosynthesis	psaB	0.04048	1.3291	730	(Lepi_new:0.3898657190,(MarsNIES:0.0613422851,YPF-701:0.0462782356):0.0174349085,(PediMino:0.0159578403,PediTube:0.0395619161):0.0192873671);	0.389866	0.199863	1.95067
photosynthesis	psaA	0.0515	1.5717	751	(Lepi_new:0.3280391618,(MarsNIES:0.0520484130,YPF-701:0.0513832304):0.0000022077,(PediMino:0.0174216314,PediTube:0.0246341128):0.0205668586);	0.328039	0.166056	1.97547
